# Supplementary material
Source: HighWire-hosted journal article supplement (https://www.ajnr.org/highwire/filestream/106570/field_highwire_adjunct_files/0/0822.pdf)
Supplement: 0822.pdf [file 0822.pdf]

Online Supplemental Data. The correlation between the lowest epidural temperature and probe diameter and material

|                | Diameter of probe (mm) | Material of probe (copper or iron) | Intravertebral temperature (°C) at the end of cryoablation (10 min after the start of cryoablation) | Epidural temperature (°C) at the end of cryoablation (10 min after the start of cryoablation) |       |
|----------------|------------------------|------------------------------------|-----------------------------------------------------------------------------------------------------|-----------------------------------------------------------------------------------------------|-------|
|                |                        |                                    |                                                                                                     | Left (Lowest epidural temperature)                                                            | Right |
| <b>Control</b> | —                      | —                                  | 35                                                                                                  | 35                                                                                            | 35    |
| <b>Case 1</b>  | 1.2                    | iron                               | 25                                                                                                  | 25                                                                                            | 29    |
| <b>Case 2</b>  | 1.2                    | iron                               | 20                                                                                                  | 20                                                                                            | 25    |
| <b>Case 3</b>  | 1.5                    | iron                               | 19                                                                                                  | 18                                                                                            | 23    |
| <b>Case 4</b>  | 1.5                    | iron                               | 18                                                                                                  | 16                                                                                            | 20    |
| <b>Case 5</b>  | 1.8                    | iron                               | 6                                                                                                   | 8                                                                                             | 20    |
| <b>Case 6</b>  | 2.0                    | iron                               | -1                                                                                                  | 4                                                                                             | 15    |
| <b>Case 7</b>  | 2.0                    | iron                               | 0                                                                                                   | 1                                                                                             | 20    |
| <b>Case 8</b>  | 1.5                    | copper                             | -17                                                                                                 | 0                                                                                             | 6     |
| <b>Case 9</b>  | 2.0                    | iron                               | -3                                                                                                  | -2                                                                                            | 15    |
| <b>Case 10</b> | 2.0                    | iron                               | 3                                                                                                   | -3                                                                                            | 20    |
| <b>Case 11</b> | 1.5                    | copper                             | -17                                                                                                 | -8                                                                                            | 6     |
| <b>Case 12</b> | 2.0                    | copper                             | -54                                                                                                 | -27                                                                                           | -2    |
| <b>Case 13</b> | 2.0                    | copper                             | -55                                                                                                 | -30                                                                                           | -28   |
| <b>Case 14</b> | 2.0                    | copper                             | -78                                                                                                 | -37                                                                                           | -34   |

**Online Supplemental Data:** Summary of the results

|                | Intravertebral temperature (°C) at the end of cryoablation (10 min after the start of cryoablation) | Epidural temperature (°C) at the end of cryoablation (10 min after the start of cryoablation) |       | Amplitude (%) of spinal cord monitoring at the end of cryoablation (10 min after the start of cryoablation) |            |           | Amplitude (%) of spinal cord monitoring after rewarming (2 h after the start of cryoablation) |            |           | Modified Tarlov scale |              | Pathologic cryogenic change |
|----------------|-----------------------------------------------------------------------------------------------------|-----------------------------------------------------------------------------------------------|-------|-------------------------------------------------------------------------------------------------------------|------------|-----------|-----------------------------------------------------------------------------------------------|------------|-----------|-----------------------|--------------|-----------------------------|
|                |                                                                                                     | Left (Lowest epidural temperature)                                                            | Right | Left CMAP                                                                                                   | Right CMAP | SCEP      | Left CMAP                                                                                     | Right CMAP | SCEP      | a day after           | 7 days after |                             |
| <b>Control</b> | 35                                                                                                  | 35                                                                                            | 35    | 95                                                                                                          | 88         | 91        | 94                                                                                            | 85         | 88        | V                     | V            | -                           |
| <b>Case 1</b>  | 25                                                                                                  | 25                                                                                            | 29    | 107                                                                                                         | 103        | 93        | 75                                                                                            | 87         | 115       | V                     | V            | -                           |
| <b>Case 2</b>  | 20                                                                                                  | 20                                                                                            | 25    | 52                                                                                                          | 71         | <b>46</b> | 84                                                                                            | 65         | 88        | V                     | V            | -                           |
| <b>Case 3</b>  | 19                                                                                                  | 18                                                                                            | 23    | <b>0</b>                                                                                                    | <b>29</b>  | 63        | 156                                                                                           | 129        | 117       | V                     | V            | -                           |
| <b>Case 4</b>  | 18                                                                                                  | 16                                                                                            | 20    | <b>0</b>                                                                                                    | <b>0</b>   | 69        | 100                                                                                           | 75         | 94        | V                     | V            | -                           |
| <b>Case 5</b>  | 6                                                                                                   | 8                                                                                             | 20    | <b>17</b>                                                                                                   | 57         | <b>42</b> | 117                                                                                           | 124        | 97        | V                     | V            | -                           |
| <b>Case 6</b>  | -1                                                                                                  | 4                                                                                             | 15    | <b>0</b>                                                                                                    | <b>0</b>   | <b>17</b> | 79                                                                                            | 118        | 88        | V                     | V            | -                           |
| <b>Case 7</b>  | 0                                                                                                   | 1                                                                                             | 20    | <b>0</b>                                                                                                    | <b>0</b>   | <b>37</b> | 40                                                                                            | 46         | 77        | V                     | V            | +                           |
| <b>Case 8</b>  | -17                                                                                                 | 0                                                                                             | 6     | <b>0</b>                                                                                                    | <b>0</b>   | <b>0</b>  | 42                                                                                            | 55         | 86        | V                     | V            | +                           |
| <b>Case 9</b>  | -3                                                                                                  | -2                                                                                            | 15    | <b>0</b>                                                                                                    | <b>0</b>   | <b>39</b> | 169                                                                                           | 144        | 117       | V                     | V            | -                           |
| <b>Case 10</b> | 3                                                                                                   | -3                                                                                            | 20    | <b>0</b>                                                                                                    | <b>0</b>   | <b>29</b> | 110                                                                                           | 100        | 114       | V                     | V            | -                           |
| <b>Case 11</b> | -17                                                                                                 | -8                                                                                            | 6     | <b>0</b>                                                                                                    | <b>0</b>   | <b>28</b> | <b>5</b>                                                                                      | <b>28</b>  | 58        | <b>III</b>            | <b>III</b>   | +                           |
| <b>Case 12</b> | -54                                                                                                 | -27                                                                                           | -2    | <b>0</b>                                                                                                    | <b>0</b>   | <b>0</b>  | <b>0</b>                                                                                      | <b>0</b>   | <b>29</b> | <b>II</b>             | <b>II</b>    | +                           |
| <b>Case 13</b> | -55                                                                                                 | -30                                                                                           | -28   | <b>0</b>                                                                                                    | <b>0</b>   | <b>0</b>  | <b>0</b>                                                                                      | <b>0</b>   | <b>0</b>  | <b>0</b>              | <b>0</b>     | +                           |
| <b>Case 14</b> | -78                                                                                                 | -37                                                                                           | -34   | <b>0</b>                                                                                                    | <b>0</b>   | <b>0</b>  | <b>0</b>                                                                                      | <b>0</b>   | <b>0</b>  | <b>0</b>              | <b>0</b>     | +                           |

CMAP, compound muscle action potential; SCEP, spinal cord-evoked potential.
